# Supplementary material for: Evidence for Widespread Positive and Negative Selection in Coding and Conserved Noncoding Regions of Capsella grandiflora
Source: PubMed Central journal article supplement (PMC4178662; doi:10.1371/journal.pgen.1004622), 2014-09-25

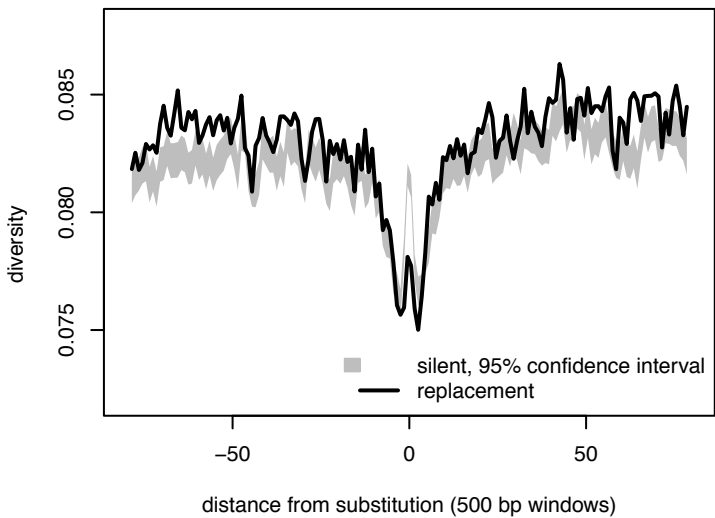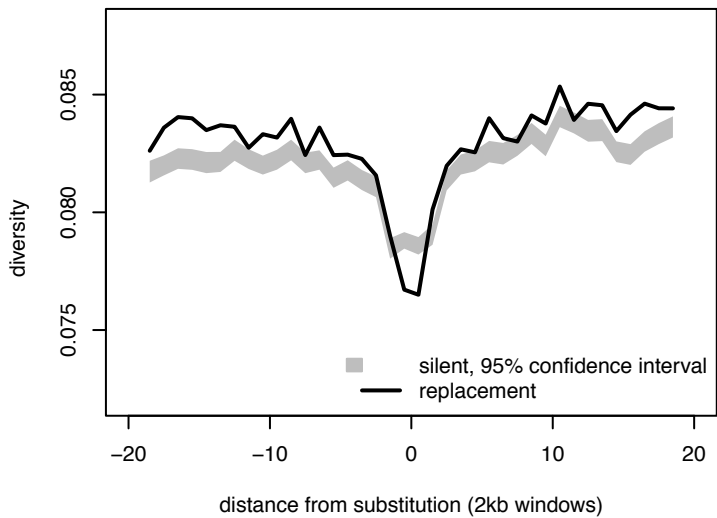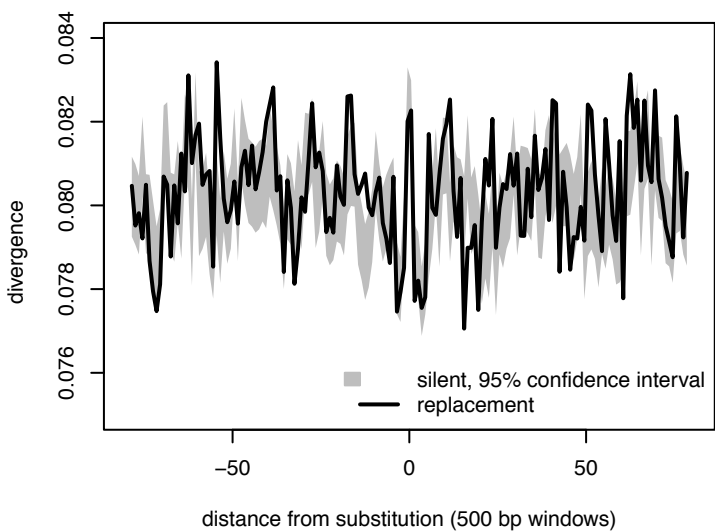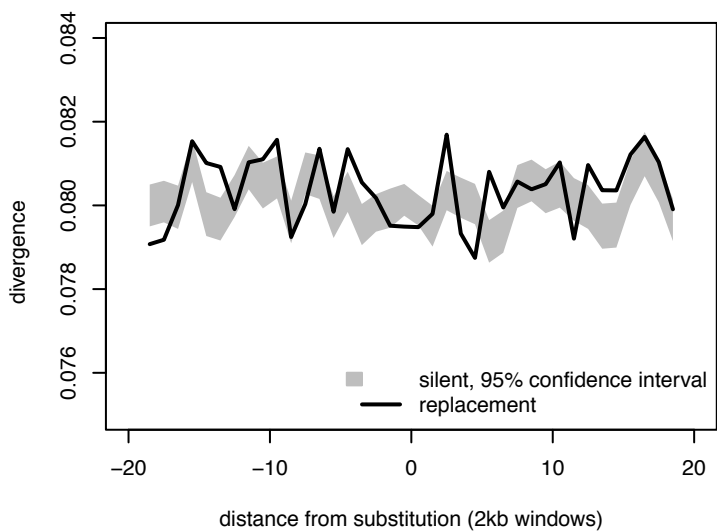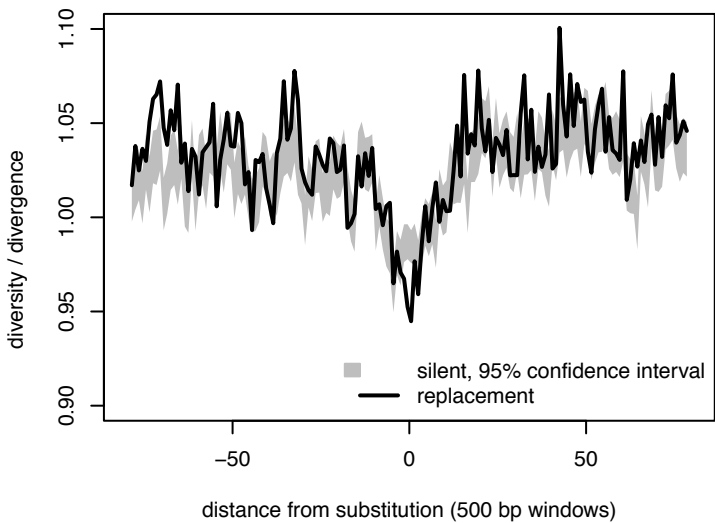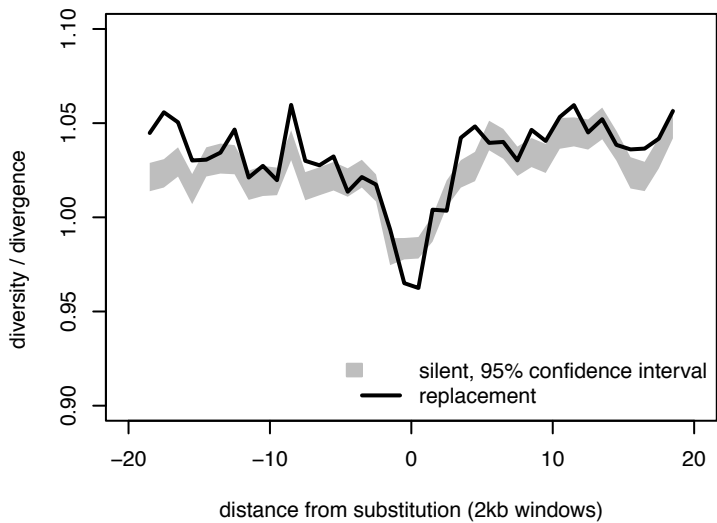

Supplement: pgen.1004622.s008.pdf [file pgen.1004622.s008.pdf]
